# Supplementary material
Source: PubMed Central journal article supplement (PMC3412211)
Supplement: JPE-49-670-s003.pdf [file JPE-49-670-s003.pdf]

Pitcher, C.R., Lawton, P., Ellis, N., Smith, S.J., Incze, L.S., Wei, C-L., Greenlaw, M.E., Wolff, N.H., Sameoto, J.A. & Snelgrove, P.V.R. (2012) Exploring the role of environmental variables in shaping patterns of seabed biodiversity composition in regional-scale ecosystems. *Journal of Applied Ecology*

## **Appendix S2. Descriptions of regional environmental variables.**

This supplementary information provides details of the environmental variables collated for the three large marine regions: the Australia's Great Barrier Reef shelf (GBR), the deep Gulf of Mexico (DGoMx) and the temperate Gulf of Maine area (GoMA). The environmental variables included the various attributes of bathymetry, sediments, chemistry, and ocean colour (see Table S2-1). These datasets were derived from research and governmental databases, public ocean data portals, and online marine environmental databases (see references and data sources).

Details of data processing for the GBR region are described in Pitcher et al (2007) and for the GoMA region in Greenlaw *et al.* (2010); data processing for the DGoMx region followed similar procedures (C-L Wei, unpublished). Environmental data types originally acquired during surveys at sea (e.g. bathymetry, sediments, chemistry) did not provide full coverage so were interpolated using GIS software to obtain full coverage grids. Temporally varying environmental data (e.g. chemistry, SST and ocean colour) were summarized as a climatic mean and variation. Where possible, these climatologies were constructed to coincide with broad periods when the biological surveys occurred to minimize temporal mismatch. For example, separate oceanographic water chemistry datasets were collated to correspond with the different time periods of the GoMA historical benthic grab and more recent trawl surveys (see Appendix S1). To further minimize oceanographic differences, the SST and ocean colour datasets constructed for the pre-satellite era sediment-infauna grab surveys were selected from a modern oceanographic regime consistent with that when the grab sampling was conducted.

## **References and Data Sources**

1. Australian Bathymetry and Topography Grid  
[https://www.ga.gov.au/products/servlet/controller?event=GEOCAT\\_DETAILS&catno=67703](https://www.ga.gov.au/products/servlet/controller?event=GEOCAT_DETAILS&catno=67703)  
Webster, M.A. & Petkovic, P. (2005) *Australian Bathymetry and Topography Grid, June 2005*. Geoscience Australia Record 2005/12.  
<http://www.ga.gov.au/meta/ANZCW0703008022.html>
2. Climatologies for sea surface chlorophyll concentration (Chlor), surface diffuse attenuation coefficient (K490) and sea surface temperature (SST) were calculated from NASA Ocean Colour standard monthly data products from the SeaWiFS and MODIS satellites <http://oceancolor.gsfc.nasa.gov/>. SST was also sourced from NASA AVHRR Pathfinder V5 data.
3. CSIRO Atlas of Regional Seas (CARS) <http://www.marine.csiro.au/~dunn/cars2009/>  
Ridgway, K.R., Dunn, J.R. & Wilkin, J.L. (2002) Ocean interpolation by four-dimensional least squares - Application to the waters around Australia, *Journal of Atmospheric and Ocean Technology*, **19**, 1357–1375.

- Dunn J.R. & Ridgway, K.R. (2002) Mapping ocean properties in regions of complex topography. *Deep Sea Research I : Oceanographic Research*, **49**, 591–604
4. Drozdowski, A. (2005) Benthic investigation using AES40 hindcast, Part 2: friction velocity.
  5. Drozdowski, A. & Hannah, C.G. (2010) *Bottom stress maps of the eastern north American continental shelf: contributions from tidal currents combined with large wave events*. Canadian Technical Report of Hydrography and Ocean Sciences. Fisheries and Oceans, Canada
  6. Export Particulate Organic Carbon flux to the seafloor (E.POC) was calculated using an exponential decay model ( $\text{flux}(z) = 3.523 \times \text{NPP} \times z^{-0.734}$ ), where  $z$  = depth  
Biggs, D.C., Hu, C. & Müller-Karger, F.E. (2008) Remotely sensed sea-surface chlorophyll and POC flux at Deep Gulf of Mexico Benthos sampling stations. *Deep Sea Research Part II: Topical Studies in Oceanography*, **55**, 2555–2562  
Pace, M.L., Knauer, G.A., Karl, D.M. & Martin, J.H. (1987) Primary production, new production and vertical flux in the eastern Pacific Ocean. *Nature*, **325**, 803–804.
  7. GBR Seabed Current Stress RMS N/m<sup>2</sup>, provided 2001 by Lance Bode and Luciano Mason, James Cook University, Townsville, Australia.  
Bode, L., Mason, L.B. & Middleton, J.H. (1997) Reef parameterisation schemes for long wave models. *Progress in Oceanography*, **40**, 285–324.
  8. Geological Survey of Canada (2009) *Expedition Database*. Accessed August 2009 from [http://gdr.nrcan.gc.ca/ed/index\\_e.php](http://gdr.nrcan.gc.ca/ed/index_e.php)
  9. Greenlaw, M., Sameoto, J.A., Wolff, N., Lawton, P., Incze, L., Pitcher, C.R., Smith, S.J. & Drozdowski, A. (2010) *A geodatabase of historical and contemporary physical oceanographic datasets: investigating the role of the physical environment in shaping patterns of seabed biodiversity in the Gulf of Maine*. Canadian Technical Report of Fisheries and Aquatic Sciences No. 2895. Fisheries and Oceans, Canada. 33p.
  10. Gregory, D. & Narayanan, S. (2004) Biochem: a national archive for marine biology and chemistry data. *AZMP Bulletin*, **3**, 11–17.
  11. Gregory, D.N. (2004) *Climate: a database of temperature and salinity observations for the Northwest Atlantic*. Canadian Science Advisory Secretariat Research Document 2004/075.
  12. MARine Sediments Database (MARS) <http://www.ga.gov.au/oracle/mars/>  
Passlow, V., Rogis, J., Hancock, A., Hemer, M., Glenn, K. & Habib, A. (2005) *National marine sediments database and seafloor characteristics project, final report*. Geoscience Australia, Record 2005/08.
  13. Mountain, D.G., Taylor, M.H. & Bascunan, C. (2004) *Revised Procedures for Calculating Regional Average Water Properties for Northeast Fisheries Science Cruises*. Northeast Fisheries Science Center Reference Document 04-08.
  14. National Geophysical Data Center, National Oceanic and Atmospheric Administration, U.S. Department of Commerce, <http://www.ngdc.noaa.gov/>.

15. Net primary production (NPP) is a SeaWiFS derived product sourced from the Ocean Productivity Home Page, Oregon State University, U.S.  
<http://www.science.oregonstate.edu/ocean.productivity>
16. Poppe, L.J., Williams, S.J. & Paskevich, V.F. (2005) *U.S. Geological Survey east-coast sediment analysis: procedures, database, and GIS data*. U.S. Geological Survey Open-File Report 2005-1001.
17. Pitcher, C.R., Doherty, P., Arnold, P., Hooper, J., Gribble, N. & 55 others. (2007) *Seabed Biodiversity on the Continental Shelf of the Great Barrier Reef World Heritage Area*. AIMS/CSIRO/QM/QDPI Final Report to CRC Reef Research. 320 pp.  
<http://www.reef.crc.org.au/resprogram/programC/seabed/final-report.htm>
18. Queensland East Coast Otter Trawl Fishery vessel monitoring system fishing effort data. Queensland Department of Primary Industries & Fisheries, Australia.  
Gribble, N.A., Good, N., Peel, D., Tanimoto, M. & Officer, R. (2007) *Innovative stock assessment and effort mapping using VMS and electronic logbooks*. Final Report to FRDC 2002/056.
19. Rebeck, N.D., Townsend, D.W. & Thomas, M.A. (2009) Gulf of Maine region nutrient and hydrographic database. October 2009:  
<http://grampus.umeoce.maine.edu/nutrients/#Data>
20. Relative benthic irradiance, calculated as follows taking seasonality into account:  
$$B\_IRR = \cos((LAT - \text{offsetN}) / 180 * \pi) * \exp(K490\_monthN * BATHY)$$
where K490\_monthN are the mean monthly values of the NASA SeaWiFS attenuation coefficient at 490 nm, BATHY is Depth (m), LAT is the latitude of the site, and offsetN is the latitude position of the sun for monthN so that (LAT-offsetN) is the angle between the site position and the sun. The annual average B\_Irr\_av is the average of the monthly estimates and the seasonal range B\_Irr\_sr is the max-min of the monthly values.
21. Rowe, G.T. & Kennicutt, M.C. (2008) The Deep Gulf of Mexico Benthos Program. *Deep Sea Research Part II: Topical Studies in Oceanography*, **55**, 2535–2712.
22. Rowe, G.T. & Kennicutt, M.C. (2009) *Northern Gulf of Mexico continental slope habitats and benthic ecology study, final report*. U.S. Dept. of the Interior, Minerals Management Service, Gulf of Mexico OCS Region Regional Office, New Orleans, LA., p. 417.
23. Roworth, E. & Signell, R.P. (1998) *Construction of a digital bathymetry for the Gulf of Maine*. Coastal and Marine Geology Program, US Geological Survey:  
<http://pubs.usgs.gov/of/1998/of98-801/>

**Table S2-1:** Description of environmental variables by region, with ranges at sampled sites. Superscripts in regional columns indicate data sources.

| Variable   | Description of environmental variable                                                                   | GBR <sup>17</sup>        | GoMA <sup>9</sup>                 | DGoMx                        |
|------------|---------------------------------------------------------------------------------------------------------|--------------------------|-----------------------------------|------------------------------|
| Lat        | Latitude range                                                                                          | 10.5S – 24.5S            | 39.92N – 44.99N                   | 23.5N – 29.5N                |
| Lon        | Longitude range                                                                                         | 142.5E – 153.5E          | 63.74W – 71.02W                   | 96.0W – 85.5W                |
| Depth      | Depth from bathymetry DEM – metres                                                                      | 1 – 105 <sup>1</sup>     | 7.34 – 603.01 <sup>23</sup>       | 213 – 3,732 <sup>21,22</sup> |
| Slope      | Slope derived from bathymetry DEM – degrees                                                             | 0 – 2.17 <sup>o 1</sup>  | 0 – 7.44 <sup>23</sup>            | 0.12 – 14.73 <sup>14</sup>   |
| Aspect     | Aspect of slope derived from bathymetry DEM – degrees T                                                 | 0 – 360 <sup>o 1</sup>   | 0 – 359.9 <sup>23</sup>           | 7.4 – 354.1 <sup>14</sup>    |
| Complex    | Complexity: maximum change in slope in the 9 surrounding grid cells                                     | na                       | 0 – 0.28 <sup>23</sup>            | na                           |
| BPI        | Benthic position index                                                                                  | na                       | -55 – 45 <sup>23</sup>            | na                           |
| Mud        | Sediment % mud grainsize fraction, ( $\emptyset < 63 \mu\text{m}$ )                                     | 0 – 100 <sup>12</sup>    | 0 – 100 <sup>8,16</sup>           | 5.7 – 99.2 <sup>21,22</sup>  |
| Sand       | Sediment % sand grainsize fraction, ( $63 \mu\text{m} < \emptyset < 2 \text{mm}$ )                      | 1 – 99 <sup>12</sup>     | 0 – 100 <sup>8,16</sup>           | 0.8 – 94.2 <sup>21,22</sup>  |
| Gravel     | Sediment % gravel grainsize fraction, ( $\emptyset > 2 \text{mm}$ )                                     | 0 – 96 <sup>12</sup>     | 0 – 100 <sup>8,16</sup>           | na                           |
| Carbonate  | Sediment % carbonate ( $\text{CaCO}_3$ ) composition, percent                                           | 2 – 98 <sup>12</sup>     | na                                | na                           |
| Stress_T   | Seabed tidal current stress, RMS mean – $\text{Nm}^{-2}$                                                | ~0 – 4.5 <sup>7</sup>    | 0.01 – 3.04 <sup>55</sup>         | na                           |
| Stress_tW  | Seabed current stress with tide and Wind – $\text{Nm}^{-2}$                                             | na                       | 0 – 33.16 <sup>4</sup>            | na                           |
| Nitr_av    | Nitrate bottom water annual average $\text{NO}_3$ – $\mu\text{M}$                                       | ~0 – 11.5 <sup>3</sup>   | 0.06 – 16.32 <sup>19</sup>        | na                           |
| Nitr_sr    | Nitrate Seasonal Range                                                                                  | 0.03 – 3.7 <sup>3</sup>  | na                                | na                           |
| Phos_av    | Phosphate bottom water annual average $\text{PO}_4$ – $\mu\text{M}$                                     | 0.07 – 0.82 <sup>3</sup> | 0.11 – 1.49 <sup>19,10</sup>      | na                           |
| Phos_sr    | Phosphate Seasonal Range                                                                                | 0.01 – 0.28 <sup>3</sup> | na                                | na                           |
| Oxyg_av    | Oxygen bottom water annual average $\text{O}_2$ – $\text{ml L}^{-1}$                                    | 3.59 – 4.84 <sup>3</sup> | 4.13 – 7.92 <sup>10</sup>         | 2.44 – 5.53 <sup>21,22</sup> |
| Oxyg_sr    | Oxygen Seasonal Range                                                                                   | 0.03 – 1.57 <sup>3</sup> | na                                | na                           |
| Salin_av   | Salinity bottom water annual average S – ‰ (ppt)                                                        | 34.7 – 36.7 <sup>3</sup> | 31.52 – 35.26 <sup>10,13,11</sup> | 34.9 – 36.0 <sup>21,22</sup> |
| Salin_sr   | Salinity Seasonal Range                                                                                 | 0.07 – 4.70 <sup>3</sup> | 0.03 – 2.33 <sup>10,13,11</sup>   | 0 – 0.33 <sup>3</sup>        |
| Temp_av    | Temperature bottom water annual average T – $^{\circ}\text{C}$                                          | 16.8 – 29.0 <sup>3</sup> | 3.68 – 12.18 <sup>13,11</sup>     | 4.0 – 15.2 <sup>21,22</sup>  |
| Temp_sr    | Temperature Seasonal Range                                                                              | 0.33 – 7.49 <sup>3</sup> | 0.08 – 14.35 <sup>13,11</sup>     | 0 – 1.7 <sup>3</sup>         |
| Silic_av   | Silicate bottom water annual average Si – $\mu\text{M}$                                                 | 0.62 – 4.42 <sup>3</sup> | 0.03 – 18.05 <sup>19</sup>        | na                           |
| Silic_sr   | Silicate Seasonal Range                                                                                 | 0.13 – 6.95 <sup>3</sup> | na                                | na                           |
| Stratif_av | Surface Stratification, density difference between the surface and 50 m                                 | na                       | -0.02 – 0.44 <sup>11</sup>        | na                           |
| Strat_sum  | Surface Stratification from May to September                                                            | na                       | -0.01 – 0.47 <sup>11</sup>        | na                           |
| Chlor_av   | Chlorophyll annual average from SeaWiFS – $\text{mg m}^{-3}$                                            | 0.11 – 9.70 <sup>2</sup> | 0.44 – 4.69 <sup>2</sup>          | 0.13 – 2.29 <sup>2,6</sup>   |
| Chlor_sr   | Chlorophyll Seasonal Range                                                                              | 0.02 – 6.76 <sup>2</sup> | 0.37 – 4.67 <sup>2</sup>          | 0.15 – 9.36 <sup>2,6</sup>   |
| K490_av    | Attenuation coefficient at wavelength 490nm annual average from SeaWiFS – $\text{m}^{-1}$               | 0.03 – 1.10 <sup>2</sup> | 0.08 – 0.59 <sup>2</sup>          | 0.04 – 0.13 <sup>2</sup>     |
| K490_sr    | Attenuation coefficient Seasonal Range                                                                  | ~0 – 0.37 <sup>2</sup>   | 0.02 – 1.54 <sup>2</sup>          | 0.02 – 0.31 <sup>2</sup>     |
| SST_av     | Sea Surface Temperature annual average from Modis – $^{\circ}\text{C}$                                  | 23.6 – 27.2 <sup>2</sup> | 6.86 – 14.58 <sup>2</sup>         | 25.2 – 27.6 <sup>2,6</sup>   |
| SST_sr     | Sea Surface Temperature Seasonal Range                                                                  | 3.55 – 10.6 <sup>2</sup> | 8.68 – 18.94 <sup>2</sup>         | 5.8 – 19.6 <sup>2,6</sup>    |
| NPP_av     | Net Primary Production annual average from SeaWiFS – $\text{mg C m}^{-2} \text{d}^{-1}$                 | na                       | na                                | 301 – 3053 <sup>15,6</sup>   |
| NPP_sr     | Net Primary Production seasonal range                                                                   | na                       | na                                | 337 – 6138 <sup>15,6</sup>   |
| E.POC_av   | Export Particulate Organic Carbon flux annual average from SeaWiFS – $\text{mg C m}^{-2} \text{d}^{-1}$ | na                       | na                                | 2.7 – 77.7 <sup>6</sup>      |
| E.POC_sr   | Export Particulate Organic Carbon seasonal range                                                        | na                       | na                                | 3.1 – 275.7 <sup>6</sup>     |
| B_Irr_av   | Benthic Irradiance relative to sea surface at equator, annual average                                   | ~0 – 0.86 <sup>20</sup>  | 0 – 0.21 <sup>20</sup>            | na                           |
| B_Irr_sr   | Benthic Irradiance Seasonal Range                                                                       | ~0 – 0.55 <sup>20</sup>  | 0 – 0.28 <sup>20</sup>            | na                           |
| Trawl_Eff  | Trawl Effort, weighted annual average – hours per 0.01 $^{\circ}$ cell                                  | 0.00 – 109 <sup>18</sup> | na                                | na                           |
